# Supplementary material for: Impacts of sea ice melting procedures on measurements of microbial community structure
Source: Oxford University Press journal article supplement (doi:10.1525/elementa.2022.00017), 2022-01-01
Supplement: tables2.xlsx [file tables2.xlsx]

## Sheet: TableS2
Sequence	Phylum	Class	Taxa	SM vs. DM, log2 fold change	SM vs. DM, p adj	IM vs. SM, log2 fold change	IM vs. SM, p adj	IM vs. DM, log2 fold change	IM vs. DM, p adj
CATTATTCGGAATTATTGGGCGTAAAGTGCATGTAGGTGGTTTATTAAGTTGATTGTTAAATCCCATGGCCTAACTATGGGGCTGCGGTCAAAACTGGTAGACTAGAGGATGAAAGAGAAGAGTGGAATTCTCGGAGTAGCGGTTAAATGCGTGGATCTCGAGAGGAACATCATTGGCGAAGGCAGCTCTTTGGTTCATTTCTGACACTAAAATGCGAAGGCG	Spirochaetes	Spirochaetia	Turneriella parva DSM 21527	NA	NA	NA	NA	NA	NA
CGTAGTTCGGAATTACTGGGCTTAAAGAGTTCGTAGGTGGTTAAAAAAGTTGATGGTGAAATCCCAAGGCTCAACCTTGGAACTGCCATCAAAACTTTTTAGCTAGAGTATGATAGAGGAAAGTGGAATTTCTAGTGTAGAGGTGAAATTCGTAGATATTAGAAAGAACACCAAATGCGAAGGCAACTTTCTGGATCATTACTGACACTGAGGAGCGAAAGCA	Proteobacteria	Alphaproteobacteria	Candidatus Pelagibacter	24.2485	7.2752e-11	NA	NA	23.327	2.13456e-08
CGTAGTTCGGAATTACTGGGCTTAAAGAGTTCGTAGGTGGTTAAAAAAGTTGATGGTGAAATCCCAAGGCTCAACCTTGGAACTGCCATCAAAACTTTTTAGCTAGAGTATGATAGAGGAAAGTGGAATTTCTAGTGTAGAGGTGAAATTCGTAGATATTAGAAAGAACATCAAAAGCGAAGGCAACTTTCTGGATCATTACTGACACTGAGGAACGAAAGCA	Proteobacteria	Alphaproteobacteria	Candidatus Pelagibacter	26.7181	3.61236e-14	23.5064	1.98017e-10	22.1188	4.26887e-09
CGTTAATCGGAATTACTGGGCGTAAAGCGCACGTAGGTGGTTATGTAAGTTAGATGTGAAAAACCCGGGCTTAACCTGGGCCGTGCATCTGATACTGCATGACTAGAGTATGATAGAGGGAAGTGGAATTTCAGGTGTAGCGGTGAAATGCGTAGATATCTGAAGGAACACCAGTGGCGAAGGCGACTTCCTGGCTCAATACTGACACTGAGGTGCGAAAGCG	Proteobacteria	Gammaproteobacteria	Woeseia oceani	23.5636	1.65047e-10	NA	NA	23.0094	3.24361e-08
CGTTAATCGGAATTACTGGGCGTAAAGCGCGCGTAGGCGGCCTGGTCAGTCGGATGTGAAAGCCCCGGGCTTAACCTGGGAATTGCATTCGATACTGCCCGGCTAGAATGTAGTAGAGGGAAGTGGAATTCCAGGTGTAGCGGTGAAATGCGTAGATATCTGGAGGAACATCAGTGGCGAAGGCGACTTCCTGGACTAACATTGACGCTGAGGCGCGAAAGCG	Proteobacteria	Gammaproteobacteria	Immundisolibacter cernigliae	24.4412	5.53081e-11	NA	NA	NA	NA
CGTTAATCGGAATTACTGGGCGTAAAGCGCGCGTAGGCGGTTAGATAAGTAAGATGTGAAATCCCCGGGCTCAACCTGGGAACTGCATCTTAAACTGTTTAACTAGAGTTTAGGAGAGGGAAGTAGAATTTCAGGTGTAGCGGTGAAATGCATAGAGATCTGAAGGAATACCAGTGGCGAAGGCGACTTCCTGGCCTAGAACTGACGCTGAGGTGCGAAAGCG	Proteobacteria	Gammaproteobacteria	Cycloclasticus sp. P1	24.6909	3.77882e-11	-20.4557	1.83717e-07	NA	NA
CGTTAATCGGAATTACTGGGCGTAAAGCGCGCGTAGGCGGTTATTTAAGCTAGATGTGAAAGCCCAGGGCTCAACCTTGGAATTGCATTTAGAACTGGGTAACTAGAGTACAAGAGAGGGTGGTGGAATTTCCAGTGTAGCGGTGAAATGCGTAGAGATTGGAAAGAACACCGATGGCGAAGGCACTTTACTGGGCTATTACTAACACTGAGAGACGAAAGCT	Proteobacteria	Gammaproteobacteria	Colwelliaceae	NA	NA	NA	NA	NA	NA
CGTTAATCGGAATTACTGGGCGTAAAGCGCGCGTAGGCGGTTCGGTAAGTTGGATGTGAAAGCCCAGGGCTCAACCTTGGAACTGCATTCAAAACTGCCAGGCTAGAGTACGGTAGAGGGGGGTAGAATTCCACGTGTAGCGGTGAAATGCGTAGAGATGTGGAGGAATACCAGTGGCGAAGGCGGCCCCCTGGATCGATACTGACGCTGAGGTGCGAAAGCG	Proteobacteria	Gammaproteobacteria	Pseudohongiella spirulinae	NA	NA	NA	NA	NA	NA
CGTTAATCGGAATTACTGGGCGTAAAGCGCGCGTAGGCGGTTTGGTAAGTCAGATGTGAAAGCCCTGGGCTTAACCTAGGAATTGCATTTGAAACTGCTGAACTAGAGTATGGTAGAGGGAAGTGGAATTCCACATGTAGCGGTGAAATGCGTAGAGATGTGGAGGAACACCAGTGGCGAAGGCGACTTCCTGGACCAATACTGACGCTGAGGTGCGAAAGCG	Proteobacteria	Bacteria	Proteobacteria	23.6329	1.49936e-10	NA	NA	22.1637	8.27033e-08
CGTTAATCGGAATTACTGGGCGTAAAGCGCGCGTAGGTGGATAGTTAAGTCGGATGTGAAAGCCCAAGGCTCAACCTTGGAACTGCATTCGATACTGGCTATCTAGAGTATAATAGAGGGAAGTGGAATTTCCGGTGTAGCGGTGAAATGCGTAGATATCGGAAGGAACATCAGTGGCGAAGGCGGCTTCCTGGATTAATACTGACACTGAGGTGCGAAAGCG	Proteobacteria	Gammaproteobacteria	Gammaproteobacteria	23.8728	1.07096e-10	NA	NA	22.9256	3.62917e-08
CGTTAATCGGAATTACTGGGCGTAAAGCGCGCGTAGGTGGTTTGGTAAGTCAGATGTGAAAGCCCCGGGCTTAACCTGGGAACTGCATTTGAAACTGCCTGACTAGAGTATGGTAGAGGGAAGTGGAATTCCACATGTAGCGGTGAAATGCGTAGAGATGTGGAGGAACACCAGTGGCGAAGGCGACTTCCTGGACTAATACTGACACTGAGGTGCGAAAGCG	Proteobacteria	Gammaproteobacteria	Acidiferrobacter sp. SPIII_3	23.4999	1.82632e-10	NA	NA	22.6025	5.12677e-08
CGTTAATCGGAATTACTGGGCGTAAAGCGTGCGTAGGCGGTTTGTTAAGTCAGATGTGAAAGCCCCGGGCTTAACCTGGGAACTGCATTTGATACTGGCAAACTAGAATGTGGTAGAGGGAAGTGGAATTCCTCATGTAGCGGTGAAATGCGTAGATATGAGGAGGAACACCAGTGGCGAAGGCGACTTCCTGGACCAACATTGACGCTGAGGTACGAAAGCG	Proteobacteria	Gammaproteobacteria	Beggiatoa leptomitoformis	NA	NA	NA	NA	NA	NA
CGTTAATCGGAATTACTGGGCGTAAAGGGCGCGTAGGCGGCTTGATAAGTCGGATGTGAAAGCCCCGGGCTTAACCTGGGAATTGCATTCGATACTGTCCGGCTAGAGTATGGTAGAGGTGAGCGGAATTCCGGGTGTAGCGGTGAAATGCGTAGATATCCGGAGGAACATCAGTGGCGAAGGCGGCTCACTGGACCAATACTGACGCTGAGGCGCGAAAGCG	Proteobacteria	Gammaproteobacteria	Thiohalobacter thiocyanaticus	23.7868	1.17639e-10	NA	NA	22.8729	3.80062e-08
CGTTAATCGGAATTACTGGGCGTAAAGGGTCCGCAGGTTGTTTTGTAAGTCAGATGTGAAAGCCCCGGGCTTAACCTGGGAACTGCGTCTGAAACTACAAGGCTAGAGTATGGCAGAGGGGGGTGGAATTCCGCGTGTAGCAGTGAAATGCGTAGATATGTGGAGGAACACCGATGGCGAAGGCAGCCCCCTGGGTCAATACTGACGCTGAGGGACGAAAGCA	Proteobacteria	Betaproteobacteria	Nitrosomonas	24.8365	3.30268e-11	-24.8392	2.38819e-10	NA	NA
CGTTAATCGGAATTACTGGGCGTAAAGGGTTCGTAGGTTGTTATGTAAGTTGGCTGTGAAAGCCCCGGGCTCAACCTGGGATGGTCAGTCAAAACTACATGGCTAGAGTATAGTAGAGGGGTGTGGAATTTCCGGTGTAGCGGTGAAATGCGTAGAGATCGGAAGGAACACCAGTGGCGAAGGCGGCACCCTGGACTAATACTGACACTGAGGAACGAAAGCG	Proteobacteria	Gammaproteobacteria	Legionella geestiana	23.2131	2.8737e-10	NA	NA	22.2684	7.48611e-08
CGTTACTCGGAATCACTGGGCGTAAAGAGAATGTAGGCGGGTAATTAAGTCAGAAGTGAAATCCAATAGCTCAACTATTGAACTGCTTTTGAAACTGATAATCTAGAATATGGGAGAGGTAGATGGAATTTCTGGTGTAGGGGTAAAATCCGTAGAGATCAGAAGGAATACCGATTGCGAAGGCGATCTACTGGAACATTATTGACGCTGAGATTCGAAAGCG	Proteobacteria	Epsilonproteobacteria	Poseidonibacter parvus	NA	NA	NA	NA	NA	NA
CGTTACTCGGAATTACTGGGCGTAAAGCGAGCGTAGGCGGTTTAATAAGTTGAGGGTGAAAGCCCGGGGCTCAACCCCGGAAATGCCCTCAAAACTATTTGACTAGAGGACGGGAGAGGGGAGTGGAACTCCCAGTGTAGAGGTGAAATTCGTAGATATTGGGAAGAACACCAGTGGCGAAGGCGACTCTCTGGACCGTTTCTGACGCTAAGGCTCGAAAGCG	Proteobacteria	Alphaproteobacteria	Magnetospira sp. QH-2	NA	NA	NA	NA	NA	NA
CGTTATCCGGAATCACTGGGTTTAAAGGGTGCGTAGGCGGATAAATAAGTCAGAGGTGAAAGCTTTCCGCTTAACGGGAAAATTGCCTTTGAAACTGTTTATCTTGAATTATGTTGAGGTTAGCGGAATGTGACATGTAGCGGTGAAATGCATAGATATGTCATAGAACACCAATTGCGAAGGCAGCTAGCTAGGCATATATTGACGCTGAGGCACGAAAGCG	Bacteroidetes	Saprospiria	Haliscomenobacter hydrossis DSM 1100	8.81912	0.0827027	NA	NA	8.71365	0.0998909
CGTTATCCGGAATCACTGGGTTTAAAGGGTGCGTAGGTGGACTAGTAAGTCAGAGGTGAAATCCCGTCGCTTAACGACGGAACTGCCTTTGATACTGCTTGTCTTGAATCAGGTTGAGGTATGCGGAATGTGGCATGTAGCGGTGAAATGCGTAGATATGCCATAGAACACCGATTGCGAAGGCAGCATACTGGCCCTGTATTGACACTGAGGCACGAAAGCG	Bacteroidetes	Saprospiria	Haliscomenobacter hydrossis DSM 1100	10.5787	0.00136607	NA	NA	10.4709	0.00428652
CGTTATCCGGAATCATTGGGTTTAAAGGGTCCGCAGGCGGTCAATTAAGTCAGAGGTGAAAGCCCATCGCTCAACGATGGAACTGCCTTTGATACTGGTTGACTTGAGTTATACGGAAGTAGATAGAATAAGTAGTGTAGCGGTGAAATGCATAGATATTACTTAGAATACCGATTGCGAAGGCAGTCTACTACGTATATACTGACGCTCATGGACGAAAGCG	Bacteroidetes	Flavobacteriia	Tenacibaculum dicentrarchi	7.49914	0.057845	NA	NA	7.3914	0.0786648
CGTTATCCGGAATCATTGGGTTTAAAGGGTCCGCAGGCGGTTTTTTAAGTCAGAGGTGAAAGCCTACAGCTCAACTGTAGAACGGCCTTTGATACTGAAAAACTTGAGTTATTATGAAGTGGTTAGAATGTGTGGTGTAGCGGTGAAATGCATAGATATCACACAGAATACCGATTGCGAAGGCAGATCACTAATAATATACTGACGCTCATGGACGAAAGCG	Bacteroidetes	Flavobacteriia	Kordia	24.1167	7.75668e-11	-22.1223	1.4805e-08	NA	NA
CGTTATCCGGAATCATTGGGTTTAAAGGGTCCGTAGGCGGACAATTAAGTCAGGGGTGAAATTCTGCGGCTCAACCGTAGAACTGCCCTTGATACTGGTTGTCTTGAATCGTTGTGAAGTGGTTAGAATGAGTAGTGTAGCGGTGAAATGCTTAGAGATTACTCAGAATACCGATTGCGAAGGCAGATCACTAACAACGTATTGACGCTGAGGGACGAAAGCG	Bacteroidetes	Flavobacteriia	Flavobacteriaceae	23.4018	2.09163e-10	-21.7122	2.80093e-08	NA	NA
CGTTATCCGGAATCATTGGGTTTAAAGGGTCCGTAGGCGGACTAATAAGTCAGAGGTGAAATCCCGCAGCTCAACTGTGGAACTGCCTTTGAAACTGTTAGTCTTGAGTTATTGTGAAGTGGTTAGAATATGTAGTGTAGCGGTGAAATGCTTAGAGATTACATGGAATACCGATTGCGAAGGCAGATCACTAACAATATACTGACGCTGATGGACGAAAGCG	Bacteroidetes	Flavobacteriia	Flavobacteriaceae	8.77798	0.0427138	NA	NA	NA	NA
CGTTATCCGGAATCATTGGGTTTAAAGGGTCCGTAGGCGGGAATCTAAGTCAGTGGTGAAATCTTACAGCTCAACTGTAAAATTGCCATTGATACTGGGTTTCTTGAATTAGTGTGAAGTGATTAGAATGTGTAGTGTAGCGGTGAAATGCATAGATATTACACAGAATACCAATTGCGAAGGCAGATCACTAACACTATATTGACGCTGAGGGACGAAAGCG	Bacteroidetes	Flavobacteriia	Flavobacteriaceae	26.8544	8.83037e-13	NA	NA	25.9012	9.22735e-10
CGTTATCCGGAATCATTGGGTTTAAAGGGTCCGTAGGTGGATAATTAAGTCAGAGGTGAAAGTTTGCAGCTCAACTGTAAAATTGCCTTTGATACTGGTTATCTTGAGTTATTATGAAGTAGTTAGAATATGTAGTGTAGCGGTGAAATGCATAGATATTACATAGAATACCAATTGCGAAGGCAGATTACTAATAATTAACTGACACTGATGGACGAAAGCG	Bacteroidetes	Flavobacteriia	Formosa	-22.6553	1.0376e-09	NA	NA	29.021	2.2584e-12
CGTTATCCGGATTTATTGGGTTTAAAGGGTACGTAGGCGGAACTTTAAGTCAGTAGTGAAAGCCTCCCGCTCAACGGGAGAACTGCTATTGATACTGAAGTTCTTGAATATAGTTGAAGTAGGCGGAATACGGCATGTAGCGGTGAAATGCATAGATATGCCGTGGAACACCAATCGCGAAGGCAGCTTACTAAGCTATTATTGACGCTAAGGTACGAAAGCG	Bacteroidetes	Flavobacteriia	Owenweeksia hongkongensis DSM 17368	NA	NA	NA	NA	NA	NA
CGTTATCTATCATAACTGGGCGTAAAGAGTTCGTAGACGGTAATGTAAGTTATTTGTTAAATTTTAAAGCTTAACTTTATTTAGCATTTAATACTGCTTTACTTTGAGTTTTATGCAGAAGAGTAGAATTTTATTTGTAAGGGTAAAATCTAATAATAAATAAAGGAATTCCAGTAGGCGAAGGCGACTCTTTAGCAAAAACTGACGTTGAGGGACGAAAGTG	Proteobacteria	Gammaproteobacteria	Glaciecola amylolytica	24.9698	2.74158e-11	NA	NA	24.0199	1.03435e-08
CGTTATTCGAAATCACTGGGCTTAAAGGGCGCGTAGGCGGATATGTAAGTGTTGAGTGAAATCCCTCGGCTTAACCGAGGAATTGCTTAGCAAACTGCATATCTTGAGGCAAGTAGGGGTGTGTGGAACTCTTGGTGGAGCGGTGGAATGCGTAGATATCAAGAGGAACGCCGAAGGTGAAGACAGCACACTGGACTTGTACTGACGCTGAGGCGCGAAAGCG	Planctomycetes	Phycisphaerae	Anaerohalosphaera lusitana	NA	NA	NA	NA	NA	NA
CGTTATTCGGAATCATTGGGCGTAAAGGGCGCGTAGGCGGTTTAACAAGTCAGATGTGAAATCCCGGGGCTTAACCCCGGTAGGTCATTTGAAACTGTTGGACTTGAGTGAGGTAGAGGAAAGCGGAATTCCTGGTGTAGCGGTGAAATGCGTAGATATCAGGAGGAACATCTGTGGCGAAGGCGGCTTTCTGGACCTAAACTGACGCTGATGCGCGAAGGCG	Proteobacteria	Deltaproteobacteria	Desulfococcus multivorans	25.3428	1.29404e-11	NA	NA	NA	NA
CGTTATTCGGAATTATTGGGCGTAAAGGGCTCGCAGGCTGCTTGAACAGTTAGACGTGAAATCCCCGGGCTCAACCTGGGAACTGCGTTTAATACTAGCAAGCTAGAGTAATAGAGAGGAAAGTGGAACTCCCAGTGTAGAGGTGAAATTCGTAGATATTGGGAAGAACACCAGTGGCGAAAGCGGCTTTCTGGCTATTTACTGACGCTGAGGAGCGAAAGCG	Proteobacteria	Alphaproteobacteria	Rhodospirillales	24.1278	7.75668e-11	NA	NA	23.4178	1.88698e-08
CGTTATTCGGTATTATTGGGCGTAAAGGGCGCGTAGGCGGCCATTTAAGTCGGGTGTGAAATCCCGGGGCTTAACCCCGGAACTGCATCCGATACTGTATGGCTTGAGTATGGGAGAGGGAAGTGGAATTCCAGGTGTAGAGGTGAAATTCGTAGATATCTGGAGGAACACCAGTGGCGAAGGCGACTTCCTGGACCAATACTGACGCTGAGGCGCGAAGGCG	Proteobacteria	Deltaproteobacteria	Desulfatibacillum aliphaticivorans	8.72534	0.0488673	NA	NA	NA	NA
CGTTGTCCGGAATTACTGGGCGTAAAGAGCTCGTAGGTGGTTTGGTAAGTCAGATGTGAAAACTCAGGGCTCAACCCTGAGACGCCATCTGAAACTGCCATGACTTGAGTTCGGTAGAGGAATGTGGAATTCCTGGTGTAGCGGTGAAATGCGCAGATATCAGGAGGAACACCAACGGCGAAGGCAGCATTCTGGGCCGATACTGACACTGAGGAGCGAAAGCA	Actinobacteria	Acidimicrobiia	Acidimicrobiales	NA	NA	NA	NA	NA	NA
CGTTGTCCGGATTTATTGGGCGTAAAGAGCTCGTAGGCGGTATGTCACGTCGGATGTGAAAATCCAAGGCTCAACCTTGGACCTGCATCCGATACGGGCAAACTAGAGTGTGGTAGGGGAGACTGGAATTCCTGGTGTAGCGGTGAAATGCGCAGATATCAGGAGGAACACCAATGGCGAAGGCAGGTCTCTGGGCCATTACTGACGCTGAGGAGCGAAAGCG	Actinobacteria	Actinobacteria	Candidatus Nanopelagicaceae	23.1419	3.10779e-10	NA	NA	22.415	6.42315e-08
CGTTGTCCGGATTTATTGGGCGTAAAGAGCTCGTAGGCGGTTTTGCAAGTCGGATGTGAAAACTCAGGGCTCAACCCTGAGATGCCATCCGATACTGCAATGACTAGAGTCCGGTAGGGGAGCATGGAATTCCTGGTGTAGCGGTGGAATGCGCAGATATCAGGAGGAACACCAATGGCGAAGGCAGTGCTCTGGGCCGGTACTGACGCTGAGGAGCGAAAGCA	Actinobacteria	Acidimicrobiia	Acidimicrobium ferrooxidans DSM 10331	7.88398	0.0997952	-8.61578	0.0653953	NA	NA
CGTTGTCCGGATTTATTGGGCGTAAAGAGTTCGTAGGCGGTTTTTCACGTCGGATGTGAAAACTCAGGGCTCAACCCTGAGCCTGCATTCGATACGGGAAGACTTGAGGACGGCAGGGGAGACTGGAACTCCTGGTGTAGCGGTGGAATGCGCAGATATCAGGAAGAACACCAATGGCGAAGGCAGGTCTCTGGGCCGATCCTGACGCTGAGGAACGAAAGCG	Actinobacteria	Actinobacteria	Candidatus Nanopelagicaceae	8.76244	0.0860346	NA	NA	NA	NA
CGTTGTCCGGATTTATTGGGCGTAAAGGGCTCGTAGGCGGTTCAACAAGTCGGTCGTGAAAACCCGGGGCTCAACCCCGGGACGCCGGTCGAAACTGTTGTGACTAGGGTCCGGTAGAGGTGAGTGGAATTCTCGGTGTAGCGGTGGAATGCGCAGATATCGAGAGGAACACCAGTAGCGAAGGCGGCTCACTGGGCCGGTACCGACGCTGAGGAGCGAAAGCA	Actinobacteria	Acidimicrobiia	Acidimicrobiales	23.3465	2.26763e-10	-22.3884	1.00403e-08	NA	NA
CGTTGTTCGGAATAACTGGGCGTAAAGCGTGTGTAGGCCGCGCGGAAAGTCGGATGTGAAAGCCCAAGGCTCAACCTTGGAACTGCATCCGATACTCCCGTGCTAGAGTAATGGAGAGGTAAGTGGAATTCTCGGTGTAGCAGTGAAATGCGTAGATATCGAGAGGAACATCAATGGCGAAGGCAACTTACTGGACATTCACTGACGCTCAGACACGAAGGCT	Verrucomicrobia	Verrucomicrobiae	Luteolibacter luteus	8.6157	0.0481171	NA	NA	8.50924	0.0653615
CGTTGTTCGGAATAACTGGGCGTAAAGCGTGTGTAGGCTGCGCGGAAAGTCAAATGTGAAAGCCAGGGGCTCAACCTCTGAACTGCATTCGATACTCCCGCGCTAGAGTAATGGAGAGGTAAGTGGAATTCTCGGTGTAGCAGTGAAATGCGTAGATATCGAGAGGAACATCAATGGCGAAGGCAACTTACTGGACATTTACTGACGCTCAGACACGAAGGCT	Verrucomicrobia	Verrucomicrobiae	Verrucomicrobiales	NA	NA	NA	NA	NA	NA
CGTTGTTCGGAATAACTGGGCGTAAAGGGTACGTAGGCGGTTTGGTAAGTTAGATGTGAAAGCCCAGGGCTCAACCTTGGAACTGCATTTAATACTGCCAGACTTGAGATCGGAAGAGGAAAGTGGAATTTCTAGTGTAGAGGTGAAATTCGTAGATATTAGAAGGAACATCAGAGGCGAAGGCGACTTTCTGGTCCGATACTGACGCTGAGGTACGAAAGCG	Proteobacteria	Alphaproteobacteria	Alphaproteobacteria	26.0578	4.36052e-12	NA	NA	25.171	2.59325e-09
CGTTGTTCGGAATGACTGGGCGTAAAGGGAGCGTAGGCGGTTGAGTACGTTTGGTGTGAAAGTCCTGGGCTTAACCTGGGGACTGCATTGAATACGGCTTGACTTGAGGTATAGAGGGGAAGATGGAATTGTGTGTGTAGAGGTGAAATTCGTAGATATACACAAGAACACCAGTGGCGAAGGCGATCTTCTGGCTATTACCTGACGCTAAGGCTCGAAAGCG	Proteobacteria	Alphaproteobacteria	Candidatus Paracaedibacter acanthamoebae	NA	NA	NA	NA	NA	NA
CGTTGTTCGGAATTACTGGGCGTAAAGCGCACGTAGGCGGATTAGTAAGTTAGAGGTGAAATCCCGGGGCTCAACCCCGGAACTGCCTTTAATACTGCTAGTCTTGAGTTCGAGAGAGGTGAGTGGAATTCCGAGTGTAGAGGTGAAATTCGTAGATATTCGGAGGAACACCAGTGGCGAAGGCGGCTCACTGGCTCGAAACTGACGCTGAGGTGCGAAAGTG	Proteobacteria	Alphaproteobacteria	Rhodobacteraceae	23.9653	9.58147e-11	NA	NA	23.6852	1.51193e-08
CGTTGTTCGGAATTACTGGGCGTAAAGCGTACGTAGGCGGATCAGAAAGTATGGGGTGAAATCCCAGGGCTCAACCCTGGAACTGCCTCATAAACTCCTGGTCTTGAGTTCGAGAGAGGTGAGTGGAATTCCAAGTGTAGAGGTGAAATTCGTAGATATTTGGAGGAACACCAGTGGCGAAGGCGGCTCACTGGCTCGATACTGACGCTGAGGTACGAAAGTG	Proteobacteria	Alphaproteobacteria	Rhodobacteraceae	27.6459	1.79071e-13	NA	NA	26.7805	2.35738e-10
CGTTGTTCGGAATTACTGGGCGTAAAGGGCGTGCAGGCGGGTTGGTAAGTCAGATGTGAAAGCCCTGGGCTTAACCCAGGAAGTGCATTTGAAACTGCCATCCTAGAGTATGGGAGAGGAGAGTGGAATTCCCAATGTAGAGGTGAAATTCGTAGATATTGGGAGGAACACCCGTGGCGAAGGCGACTCTCTGGACCAATACTGACGCTGAGACGCGAAAGCG	Proteobacteria	Deltaproteobacteria	Desulfobacca acetoxidans DSM 11109	NA	NA	NA	NA	NA	NA
CGTTGTTCGGATTTACTGGGCGTAAAGCGCGCGCAGGCGGATTAATAAGTCAGATGTGAAATCCCGGGGCTCAACCCCGGAACTGCGTCTGAAACTATTAGTCTAGAGTCTCATAGGGGGTAGGGGAATTTCACGTGTAGGGGTAAAATCCGTAGAGATGTGAAGGAACACCGGTGGCGAAGGCGCCTACCTGGATGAGTACTGACGCTGAGGCGCGAAAGCG	Proteobacteria	Oligoflexia	Halobacteriovorax marinus SJ	23.7902	1.17639e-10	NA	NA	22.8511	3.86367e-08
CGTTTTTCGGATTGACTGGGCGTAAAGAGTGCGCAGGTGGTTCATTAGGTTGATGGTGAAACGAAGAAGTTACTTTCTTCTTGCTTTCAAAACCGTTGAACTTGAGTACACTAGGGGATCGTGGAATTTCGAGTGTAGGGGTAATATCCATAAAAATTCGAAGGAACATCAGTAGCGAAGGCGACGATCTGGGGTGATACTGACGCTGAGGCACGAGAGCA	Proteobacteria	Oligoflexia	Bacteriovoracales	9.10236	0.0309104	NA	NA	8.99586	0.045852
CGTTTTTCGGATTGACTGGGCGTAAAGAGTGCGTAGGTGGTTCATTAGGTTGATGGTGAAACGAAGAAGTTACTTTCTTCTTGCTTTCAAAACCGTTGAACTTGAGTACACTAGGGGATCGTGGAATTTCGAGTGTAGGGGTAATATCCATAAAGATTCGAAGGAACATCAGTAGCGAAGGCGACGATCTGGGGTGATACTGACGCTGAGGCACGAGAGCA	Proteobacteria	Alphaproteobacteria	Anaplasmataceae	-18.6669	9.962e-07	NA	NA	-22.0952	8.00409e-08
TGTTATTCAGATTAACTGGGCGTAAAGGGCGTGTAGGCGGTTTATTATGTTTTTTATGAAATGTTAAAGCATAACTTTAAAATAGTGATTAACACAGGTAAACTTGAGTTAGGTAGGGGATAACAGAATTCTTAGTGTAAAGGTGAAATTTAACGATACTAGGGAGAATATCGGTGGCGAAGGCGGTTATCTGGGCCTATTACTGACGTTGAGGCGCGAAAGCA	Proteobacteria	Alphaproteobacteria	Pelagibacterales	NA	NA	NA	NA	NA	NA
TGTTATTTGTAATGACTAGGCGTAAAGAGCGTGTAGGCTATCTTTTGTTAATGCTTGGGGTGAAAGGCCAACTTTGGGGGTTGGCAGGGCCCTTTGAACAAAAAGGTTGGAGTAGGCCAGGGGGTAGAGTAATTATTGGCGTAGGGGTAAAATCTTGACATACCAATAGGAAGACCGGTGGCGAAAGCGTCTGCCTGGGGCCTACTGACGCTGTAGCGCGAAAGCG	Spirochaetes	Spirochaetia	Spirochaetales	-19.4444	2.87333e-07	NA	NA	-20.7088	5.56017e-07
CGTAGTTCGGAATTACTGGGCGTAAAGAGTATGTAGGCGGCTAGATAAGTTAATTGTGAAAGCCCAAAGCTTAACTTTGGAATTGCAATTAAAACTATTTAGCTGGAGTATGATAGAGGAAAGCGGAATACATAGTGTAGAGGTGAAATTCGTAGATATTATGTAGAACACCAGTTGCGAAGGCGGCTTTCTGGATCATTACTGACGCTGAGATACGAAAGTA	Proteobacteria	Alphaproteobacteria	Candidatus Pelagibacter sp. IMCC9063	NA	NA	23.0466	2.12207e-10	24.5124	2.20144e-10
CGTTAATCGGAATTACTGGGCGTAAAGAGTATGTAGGTGGTGAATTAAGTTGGGTGTGAAATCTCGGGGCTCAACCTCGAAATTGCATTCAAAACTGGTTTGCTAGAGTATGGTAGAGGAGAGAAGAATTCTCGGTGTAGCGGTGAAATGCTTAAATATCGAGAGGAATATCAATGGCGAAGGCATCTCTCTGGACCAAAACTGACACTGAGATACGAAAGCG	Proteobacteria	Gammaproteobacteria	Sulfurivermis fontis	NA	NA	20.0663	4.35762e-07	22.6491	4.93419e-08
CGTTAATCGGAATTACTGGGCGTAAAGCGCGCGTAGGCGGTTTGTTAAGCGAGATGTGAAAGCCCTGGGCTCAACCTGGGAACTGCATTTCGAACTGGCGGGCTAGAGTACAAGAGAGGGTGGTGGAATTTCCAGTGTAGCGGTGAAATGCGTAGAGATTGGAAGGAACATCAGTGGCGAAGGCGGCCACCTGGCTTGATACTGACGCTGAGGTGCGAAAGCG	Proteobacteria	Gammaproteobacteria	Oleiphilus messinensis	NA	NA	19.7707	6.73961e-07	22.6103	5.12677e-08
CGTTAATCGGAATTACTGGGCGTAAAGCGTGCGCAGGCGGCTTTGTAAGACAGACGTGAAATCCCCGGGCTCAACCTGGGAATTGCGTTTGTGACTGCAAGGCTAGAGTACGGTAGAGGGGGGTAGAATTCCGCGTGTAGCAGTGAAATGCGTAGATATGCGGAGGAACACCGATGGCGAAGGCAGCCCCCTGGACCTGTACTGACGCTCATGCACGAAAGCG	Proteobacteria	Betaproteobacteria	Hydrogenophaga crassostreae	-19.2063	2.72163e-06	NA	NA	23.8248	1.26928e-08
CGTTAATCGGAATTACTGGGCGTAAAGGGTCCGCAGGTTGTTTTGTAAGTCAGATGTGAAATCCCCGGGCTTAACCTGGGAACTGCGTCTGAAACTACAAGGCTAGAGTATGGCAGAGGGGGGTGGAATTCCGCGTGTAGCAGTGAAATGCGTAGATATGTGGAGGAACACCGATGGCGAAGGCAGCCCCCTGGGTCAATACTGACGCTGAGGGACGAAAGCA	Proteobacteria	Betaproteobacteria	Nitrosomonas	NA	NA	NA	NA	9.29932	0.0605663
CGTTAATCGGATTTATTGGGCGTAAAGAGGGCGTAGGTGGGAAAGTAAGTCAGATGTGAAAGCCCGGGGCTCAACCCCGGAACAGCATCTGAAACTGCTTTTCTAGAGGGTAGGCGGAGAAAACGGAATTCCAAGTGTAGCGGTGAAATGCGTAGATATTTGGAAGAACACCGGTGGCGAAGGCGGTTTTCTAGCTTACTCCTGACACTCAAGCCCGAAAGCA	Chlamydiae	Chlamydiia	Waddlia chondrophila WSU 86-1044	NA	NA	NA	NA	NA	NA
CGTTACCCGTAATCACTGGGCGTACAGAGTCCGTAGATTGTAATATAAGTTATATGTTAAAATTTAAAGCTCAACTTTAAAAAAAGATAAAATACTGTTTTACTCGAGTTTAATACAGAAAAGCGGAATTTCGTGTTAAGGAGTAAATTCCAAAAATACATGAAGGAATATCATTAGCGAAAGCGGCTTTTTAGTACAAACTGACATTGAGGGACGAAAGTG	Bacteria	Bacteria	Bacteria	NA	NA	22.4719	2.88774e-10	24.3752	1.93578e-10
CGTTATCCAACATTACTGGGCGTAAAGAGTCCGTAGATTGTAATATAAGTTATATGTTAAAACCTAAAGCTCCACTTTAGAAAAAGATATAATACTGTTTTACTTGAGTTTTATACAGAAGAGTAGAATTTCACGTAAAGGGTTGAATTCCAAAGACACGTGAAGGAACACCATCTAGCGAAGGCGACTCTTTAGTAAAAACTGACATTGAGGGACGAAAGTG	Proteobacteria	Gammaproteobacteria	Glaciecola amylolytica	NA	NA	20.384	2.75106e-07	22.3691	6.79064e-08
CGTTATCCATCATGACTGGGCGTAAAGGGTCTGTAGACGGTGAAGTAAGTTACTTGTTAAATTTTAAAGCCTAACTTTAAGTCAGCTTGTAATACTGCTTTACTTGAGTTTTATACAGAAGAGTAGAATTTTATACGTAAGGGTAAAATCTTGAAATATATAAAGGAACACCAGTAGCGAAGGCGACTCTTTGGTAAAAACTGACGTTGAGAGACGAAAGTG	Proteobacteria	Gammaproteobacteria	Glaciecola amylolytica	NA	NA	24.8882	3.09307e-10	23.4886	1.75921e-08
CGTTATCCATCATGACTGGGCGTAAAGGGTCTGTAGACTGTAAAGTAAGTTACTTGTTAAATTTTAAAGCCTAACTTTAAACCAGCTTGTAATACTGCTTTACTTGAGTTTTATACAGAAGAGTAGAATTTTATACGTAAGGGTAAAATCTTGAAATATATAAAGGAACACCAGTAGCGAAGGCGACTCTTTGGTAAAAACTGACGTTGAGAGACGAAAGTG	Proteobacteria	Gammaproteobacteria	Glaciecola amylolytica	NA	NA	22.8677	2.31726e-10	24.4138	2.20144e-10
CGTTATCCGAATTCACTGGGCGTAAAGCGCGTGTAGGCGGTTCGGTAAGTTGGATGTGAAAGCTCCCGGCTCAACTGGGAGAGGACGTTCAAAACTGTTGGACTAGAGGGCGGAAGAGGGAGGTGGAATTCCCGGTGTAGTGGTGAAATGCGTAGATATCGGGAGGAACACCAGTGGCGAAGGCGGCCTCCTGGGCCGCACCTGACGCTCAGACGCGAAAGCT	Chloroflexi	Anaerolineae	Anaerolineaceae	NA	NA	20.4461	2.52036e-07	22.2725	7.48611e-08
CGTTATCCGCCATGACTGGGCGTAAAGGGTCCGTAGACTGTAAAATAAGTTACTTGTTAAATTTTTAAGCCTAACTTAAATAAAGCTTGTAATACTGTTTTACTTGAGTTTCATACAAAAGAGTAGAATTTTATACGGAAGGGTAAAATCTTAAAATATATAAAAGAATACCAAGAGCGGAGGCAACTCTTTAGTAAAGACTGACGTTGAGGGACGAAAGTA	Proteobacteria	Gammaproteobacteria	Glaciecola amylolytica	NA	NA	22.6367	1.69586e-11	25.2271	1.82611e-12
CGTTATCCGGAATCACTGGGTTTAAAGGGTGCGTAGGCGGTTAAATAAGTCAGAAGTGAAAGCTCATCGCTTAACGATGGAATTGCTTTTGATACTGTTTAACTTGAATTAGGTTGAGGTTAGCGGAATGAGTCATGTAGCGGTGAAATGCATAGATATGACTTAGAACACCAATTGCGAAGGCAGCTGGCTAGACCTATATTGACGCTGAGGCACGAAAGCG	Bacteroidetes	Saprospiria	Saprospira grandis str. Lewin	NA	NA	6.50142	0.0705914	9.70595	0.00157215
CGTTATCCGGAATCATTGGGTTTAAAGGGTCCGCAGGCGGACGTATAAGTCAGTGGTGAAAGCCTACAGCTTAACTGTAGAACTGCCATTGATACTGTACGTCTTGAATTCGGTCGAAGTGGGCGGAATGTGTCATGTAGCGGTGAAATGCATAGATATGACACAGAACACCGATAGCGAAGGCAGCTCACTAGGCCTGAATTGACGCTCAGGGACGAAAGCG	Bacteroidetes	Flavobacteriia	Fluviicola taffensis DSM 16823	NA	NA	NA	NA	9.6247	0.0606808
CGTTATCCGGAATCATTGGGTTTAAAGGGTCCGCAGGCGGTCAATTAAGTCAGAGGTGAAATCCCATAGCTTAACTATGGAACTGCCTTTGATACTGGTTGACTTGAGTTATACGGAAGTAGATAGAATGTGTAGTGTAGCGGTGAAATGCATAGAGATTACACAGAATACCGATTGCGAAGGCAGTCTACTACGTATATACTGACGCTCATGGACGAAAGCG	Bacteroidetes	Flavobacteriia	Tenacibaculum	NA	NA	22.7326	2.78563e-10	24.4653	2.20144e-10
CGTTATCCGGAATCATTGGGTTTAAAGGGTCCGTAGGCGGGCAATTAAGTCAGAGGTGAAATCCCACAGCTCAACTGTGGAACTGCCTTTGATACTGGTTGTCTTGAGTTACAGTGAAGTAGATAGAATATGTAGTGTAGCGGTGAAATGCATAGATATTACATAGAATACCGATTGCGAAGGCAGTCTACTAACTGTATACTGACGCTAATGGACGAAAGCG	Bacteroidetes	Flavobacteriia	Flavobacteriaceae	NA	NA	NA	NA	NA	NA
CGTTATCCGGAATCATTGGGTTTAAAGGGTCCGTAGGCGGGCAGCTAAGTCAGTGGTGAAAGTCTGCAGCTCAACTGTAGAATTGCCATTGAAACTGGTTGTCTTGAATCGTTGTGAAGTGGTTAGAATAAGTAGTGTAGCGGTGAAATGCATAGATATTACACAGAATACCGATTGCGAAGGCAGTCTACTACGTATGTACTGACGCTGAGGGACGAAAGCG	Bacteroidetes	Flavobacteriia	Flavobacteriaceae	NA	NA	21.4269	6.0903e-08	23.5646	1.66376e-08
CGTTATCCGGAATCATTGGGTTTAAAGGGTCCGTAGGTGGATAATTAAGTCAGAGGTGAAATCCTGCAGCTCAACTGTAGAATTGCCTTTGAAACTGGTTATCTTGAGTTATTATGAAGTAGTTAGAATATGTAGTGTAGCGGTGAAATGCATAGATATTACATAGAATACCGATTGCGAAGGCAGATTACTAATAATATACTGACACTGATGGACGAAAGCG	Bacteroidetes	Flavobacteriia	Olleya aquimaris	NA	NA	20.205	3.57488e-07	22.5308	5.55486e-08
CGTTATCCGGAATCATTGGGTTTAAAGGGTCCGTAGGTGGATAATTAAGTCAGAGGTGAAATCCTGCAGCTCAACTGTAGAATTGCCTTTGATACTGGTTATCTTGAGTTATTATGAAGTAGTTAGAATATGTAGTGTAGCGGTGAAATGCATAGATATTACATAGAATACCAATTGCGAAGGCAGATTACTAATAATCAACTGACACTGATGGACGAAAGCG	Bacteroidetes	Flavobacteriia	Lacinutrix venerupis	NA	NA	24.0346	1.21894e-09	24.2068	8.11033e-09
CGTTATCCGGAATCATTGGGTTTAAAGGGTTCGCAGGCGGTTTAATAAGTCAGTGGTGAAATCTCGGGGCTCAACCTCGAAACTGCCATTGATACTGTTAGACTTGAATACAGTTGGAGTAGGCGGAATGTGTAGTGTAGCGGTGAAATGCTTAGATATTACACAGAACACCGATAGCGAAGGCAGCTTACTAAACTGTGATTGACGCTCATGAACGAAAGCG	Bacteroidetes	Flavobacteriia	Fluviicola taffensis DSM 16823	NA	NA	23.0163	8.96284e-12	24.7182	5.70204e-12
CGTTATCCGGATTTACTGGGTTTAAAGGGTGCGTAGGCGGCTTCTTAAGTCAGTGGTGAAAGCCTGGCGCTTAACGCCAGAAATGCCATTGATACTGGGGAGCTTGAGTCAAGAAGAGGTAAGCAGAATTCATGGTGTAGCGGTGAAATGCATAGATACCATGAGGAATTCCAATAGCGAAGGCAGCTTACTGGTCTTTGACTGACGCTGAGGCACGAAAGCG	Bacteroidetes	Cytophagia	Amoebophilaceae	NA	NA	24.4637	6.24426e-10	23.9123	1.13245e-08
CGTTATCCGGATTTATTGGGTTTAAAGGGTCCGCAGGCGGGGTATTAAGTCAGTGGTGAAAGCCGGCAGCTCAACTGTCGAATTGCCATTGATACTGGTACTCTTGAGTGTAGTTGAAGTAGGCGGAATAAGTCATGTAGCGGTGAAATGCATAGATATGACTTAGAACACCGATTGCGAAGGCAGCTTACTAAGCTATAACTGACGCTGAGGGACGAAAGCG	Bacteroidetes	Flavobacteriia	Owenweeksia hongkongensis DSM 17368	NA	NA	23.1795	4.86396e-09	21.6891	1.62147e-07
CGTTATCCGGATTTATTGGGTTTAAAGGGTCCGTAGGCGGATCATTAAGTCAGTGGTGAAATCCGACAGCTCAACTGTCGAACTGCCATTGATACTGATGATCTTGAGTACGGTTGAAGTAGGCGGAATATGACATGTAGCGGTGAAATGCTTAGATATGTCATGGAACACCGATTGCGAAGGCAGCCTACTAAGCCGTTACTGACGCTGAGGGACGAAAGTG	Bacteroidetes	Flavobacteriia	Fluviicola taffensis DSM 16823	NA	NA	NA	NA	9.37645	0.0605663
CGTTATCCGGATTTATTGGGTTTAAAGGGTCCGTAGGCGGGAAGATAAGTCAGTGGTGAAATCCTGCAGCTCAACTGCAGAACTGCCATTGAAACTGTCTTTCTTGAATATAGATGAAGTGGGCGGAATATATCATGTAGCGGTGAAATGCATAGATATGATATAGAACACCAATTGCGAAGGCAGCTCACTAAACTATTATTGACGCTGAGGGACGAAAGCG	Bacteroidetes	Flavobacteriia	Owenweeksia hongkongensis DSM 17368	NA	NA	8.3741	0.0466796	8.92097	0.0306241
CGTTATCCGGCATAACTGGGCGTAAAGGGTCCGTAGACCGTAAAATAAGTTACTAGTTTTAAATCTAAAAGCCTAACTTTTAGTCAGCTTGTAATACTGTTTTACTTGAGTTTTATAGAGAAGAATAGAATTTTATATGAAAGGGTGAAATCTCAAGATATATAAAGGAATATCAGTGGCGAAAGCGATTCTTTAATAAAAACTGACGTTGAGGGACGAAAGTG	Tenericutes	Mollicutes	Mycoplasmataceae	NA	NA	23.9318	1.1707e-09	23.8493	1.04756e-08
CGTTATCCGGCATAACTGGGCGTAAAGGGTCCGTAGACGGTAAAATAAGTTACTGGTTTTAAATCTAAAAGCCTAACTTTTAGTCAGCCTGTAATACTGTTTTACTCGAGTTTTATACAGAAGAATAGAATTTTATATGAAAGGGTGAAATCTCAAGATATATAAAGGAATATCAGTGGCGAAAGCGATTCTTTAGTAAAAACTGACGTTGAGGGACGAAAGTG	Tenericutes	Mollicutes	Mycoplasmataceae	NA	NA	22.2575	7.82426e-09	24.7788	1.84688e-09
CGTTATCCGGCATGACTGGGCGTAAAGAGTCCGTAGACTGTACAACAAGTTAGGTGTTAAATCCTAAAGCTTAACTTTATATCAGCACCTAAGACTGTTGTACTTCGAGTTTTGTACAGAAGGTTAAAATTTTATTTGTAAGAGTAAAATCTGATTATAAATAAAGGAATGCCAGCGGCGAAGGCGTATCTTTAGTAAAAACTGACGTTGAGGGACGAAAGTG	Proteobacteria	Gammaproteobacteria	Glaciecola amylolytica	NA	NA	23.4495	1.91752e-09	24.0582	6.49844e-09
CGTTATCCGGCATGACTGGGCGTAAAGAGTTCGTAGACGGTAAAGTAAGTTTTCCGTTAAATTTTAAAACCTAATTTTAAAACAAGCGATTAATACTGCTTTACTTTGAGTTTAATACAGAAAAGTGGAATTTTATACGAAAAGGTGAAATCTGCAGATATATAAAGGAATGCCAGTAGCGAAGGCGACTTTTTGGTATAAACTGACGTTAAGGAACGAAAGTG	Proteobacteria	Gammaproteobacteria	Glaciecola amylolytica	NA	NA	22.4982	6.57308e-09	24.6978	2.5765e-09
CGTTATCTATCATAACTGGGCGTAAAGGGTTCGTAGACGGTAATGTAAGTTATTTGTTAAATTTTAAAGCTTAACTTTATTTAGCATTTAATACTGCTTTACTTTGAGTTTTGTACAGAAGAGTAGAATTTTATTTGTAAGGGTAAAATCTAATAATAAATAAAGGAATTCCAGTAGGCGAAGGCGACTCTTTAGTAAAAACTGACGTTGAGGGACGAAAGTG	Proteobacteria	Gammaproteobacteria	Glaciecola amylolytica	NA	NA	NA	NA	10.4993	0.0266126
CGTTATCTGGAATAACTGGGCGTAAAGGGTCCGTAGACTGTATTGTAAGTTATTTGTTAAAACCTAGAGCTTAACTTTAGAAAAGCATTTAATACTACTATACTTGAGTTTCTTGCAGAAGAGTAGAATTTCATGTCGAGGAGTAACGACTGCAGACACATGAAGGAATATCAGTAGCGAAGGCGACTCTTTGGTAAAAACTGACGTTGAGGGACGAAAGTG	Firmicutes	Tissierellia	Anaerococcus	NA	NA	8.61843	0.0994217	NA	NA
CGTTATTCAAAATGATTGGGCGTAAAGCGCACGTAGGTGGTGATATGTATCCATAATTATTCAGGCTACAAGTCTTGTCGATATTTATGAAGTATATGTATTTCTTGAGGGTGTGAGAGGAGCATGGAATTTCCTAGGAAGCGGTAGAATGTGTTGATCTAGGAAGGAACACCAATAGCGAAAGCAGTGCTCTGGCACATTCCTGACATTGAGGTGCGAAAGCG	Bacteria	Bacteria	Bacteria	NA	NA	20.9545	1.17888e-07	22.1155	8.79134e-08
CGTTATTCAAAATGATTGGGCGTAAAGGGTACGTAGGCGGATAGACAGGTAAATGGTTACAGTTCCAAGCTCAACTTGGATATTGCTATTTAAACCATCTTATCTAGAGTAAGAAAGAGGAAAGTGGAATTTCGAATGGAGCGGTAGAATGTGTAGATATTCGAAGGAACACCGAATGCGAAGGCAGCTTTCTGGTTCTTAACTGACGCTGAGGTACGAAAGCA	Proteobacteria	Gammaproteobacteria	Glaciecola amylolytica	NA	NA	NA	NA	9.3574	0.0710405
CGTTATTCATATTTATTTGGTGTAAAGGGTACGTAGGCGGCTTTTTAAGTCTTTTTTTAAAGTCTATACTTAAAATATTTATAAAAAGATTAGATACTGTTAAGCTAGAGTTATAAATAGGATAGTGGAATTTTTAGTGTAAGGTTAAAATCTATTGATTCTAGAAGGAACACCTTAAGTTAATGCGGCTATCTGGTTATATTTACTGACGCTCAGGTACGAAGGCA	Spirochaetes	Spirochaetia	Spirochaetales	NA	NA	NA	NA	8.18485	0.0456857
CGTTATTCGGAATCACTGGGCTTAAAGGGTGCGTAGGCGGGTTGGTAGGTCAGATGTGAAATCCCACGGCTCAACCGTGGAATTGCGTTTGAAACCACTAGTCTTGAGGGGATCAGAGGAGAGCGGAACTGATGGTGGAGCGGTGAAATGCGTTGATATTATCAGGAACACCGGTGGCGAAAGCGGCTCTCTGGGATCCTTCTGACGCTGAGGCACGAAAGCT	Planctomycetes	Planctomycetia	Mariniblastus fucicola	NA	NA	21.2209	8.00339e-08	25.0994	2.79141e-09
CGTTATTCGGAATTACTGGGCGTAAAGGGCGCGTAGGCGGACTAATAAGTTGGGAGTGAAAGCCCGGGGCTTAACCTCGGAACTGCTTTCAAAACTGTTAGTCTAGAGTGAAGTAGGGGGTGATGGAATTCCTAGTGTAGAGGTGAAATTCTTAGATATTAGGAGGAACACCGGTGGCGAAGGCGGTCACCTGGACTTCAACTGACGCTGAGGCGCGAAAGCG	Proteobacteria	Alphaproteobacteria	Rickettsia	NA	NA	25.1812	9.61014e-15	26.3643	2.67936e-14
CGTTATTCGGATTGATTGGGCGTAAAGGGTGCGTAGACGGATTTTCAAGTAGGATGTTAAATTCCTGGGCTTAACCCAGGGCATGCGTTCTAAACTGGAAGTCTAGAGTTTGGTAGAGGAAAGTGGAATTCCTAGTGTAGAGGTGAAATTCGTAGATATTAGGAGGAATACCAGAGGCGAAGGCGGCTTTCTGGACCAATACTGACGTTGAGGCACGAAAGCG	Proteobacteria	Alphaproteobacteria	Alphaproteobacteria	NA	NA	NA	NA	NA	NA
CGTTATTTGGCATAACTGGGCGTAAAGGGTTCGTAGACGGTAATGTAAGTTATTTGTTAAATTTTAAAGCTCAACTTTATTTTAGCATTTAATACTGCTTTACTTTGAGTTTGATACAGAAAAGTAGAATTTTATTTGTAAGGGTGAAATCTAATGATAAATAAAGGAATGCCAGTAAGCGAAGGCGACTTTTTAGTAAAAACTGACGTTGAGGGACGAAAGTA	Proteobacteria	Gammaproteobacteria	Glaciecola amylolytica	NA	NA	22.5011	3.31328e-10	25.1747	8.68694e-11
CGTTGCTCGGAATTACTGGGCGTAAAGGGCGCGTAGGCGGTCTTGTATGTCGGGCGTGAAAGCCCCGGGCTCAACCCGGGATGTGCGTCCGAAACTGCAAGACTAGAGTCTCGGAGAGGGAGGTGGAATTCCAGGTGTAGCGGTGGAATGCGTAGATATCTGGAAGAACACCGGTGGCGAAGGCGACCTCCTGGACGATGACTGACGCTGAGGCGCGAAAGCG	Acidobacteria	Acidobacteriia	Bryobacterales	NA	NA	NA	NA	7.99598	0.0871753
CGTTGTCCGGAATTATTGGGCGTAAAGAGTTCGTAGGTGGTTCGTTACGTCGGATGTGAAAATCTGGGGCTCAACCCCAGACCTGCATTCGATACGGGCGAGCTAGAGTTTGGTAGGGGAGACTGGAATTCCTGGTGTAGCGGTGGAATGCGCAGATATCAGGAGGAACACCAATGGCGAAGGCAGGTCTCTGGGCCAATACTGACACTGAGGAACGAAAGCG	Actinobacteria	Actinobacteria	Candidatus Planktophila vernalis	NA	NA	20.979	1.15698e-07	22.7974	4.12375e-08
CGTTGTCCGGATTTATTGGGCGTAAAGAGCTCGTAGGCGGTTAGTCACGTCGGATGTGAAAACTCAGTGCTTAACACTGAGCCTGCATTCGATACGGGCTGACTAGAGTATTGTAGGGGAGACTGGAACTCCTGGTGTAGCGGTGAAATGCGCAGATATCAGGAAGAACACCGGTGGCGAAGGCGGGTCTCTGGGCAATTACTGACGCTGAGGAGCGAAAGTG	Actinobacteria	Bacteria	Terrabacteria group	NA	NA	7.07459	0.0758758	8.31286	0.024441
CGTTGTCCGGATTTATTGGGCGTAAAGAGCTCGTAGGCGGTTCAACAAGTCGGTCGTAAAAGTTTAGGGCTCAACCCTAAAATGTCGATCGATACTGTTGTGACTAGGATACGGTAGAGGTGAATGGAATTCCGAGTGTAGCGGTGAAATGCGTAGATATTCGGAGGAACACCAATTGCGAAGGCAGTTCACTGGACCGTGATCGACGCTGAGGAGCGAAAGCT	Actinobacteria	Acidimicrobiia	Acidimicrobiales	NA	NA	NA	NA	NA	NA
CGTTGTTCGGAATTACTGGGCGTAAAGCGTACGTAGGCGGATTAGTAAGTTAGGGGTGAAATCCCAGGGCTCAACCCTGGAACTGCCTCTAAAACTGCTAGTCTAGAGATCGAGAGAGGTGAGTGGAATTCCAAGTGTAGAGGTGAAATTCGTAGATATTTGGAGGAACACCAGTGGCGAAGGCGGCTCACTGGCTCGATACTGACGCTGAGGTACGAAAGTG	Proteobacteria	Alphaproteobacteria	Rhodobacteraceae	NA	NA	22.2356	1.78601e-08	22.6563	4.93419e-08
CGTTGTTCGGAATTACTGGGCGTAAAGGGCGCGTAGGCGGATTAGTAAGTTGGGAGTGAAAGCCCGGGGCTCAACCTCGGAACTGCTTTCAAAACTGCTAGTCTTGAGTGAAGTAGGGGGTGATGGAATTCCTAGTGTAGAGGTGAAATTCTTAGATATTAGGAGGAACACCGGTGGCGAAGGCGGTCACCTGGACTTCAACTGACGCTGAGGCGCGAAAGCG	Proteobacteria	Alphaproteobacteria	Rickettsia	23.5805	8.27172e-09	25.5289	1.38951e-10	27.6782	9.41379e-11
CGTTGTTCGGAATTATTGGGCGTAAAGAGTATGTAGGCGGCTGGATAAGTCAAGCGTGTAAGCCCACGGCTCAACCGTGGAATTGCGTTTGAAACTATTCAGCTTGAGTACAGGAGAGGAAGGCGGAATTCCCAGTGTAGCGGTGAAATGCATTGATATTGGGAAGAACACCGGTGGCGAAGGCGGCCTTCTGGTCTGTTACTGACGCTGAGATACGAAAGCC	Bacteria	Bacteria	Bacteria	NA	NA	22.0542	7.98758e-09	24.0554	3.64281e-09
CGTTGTTCGGAATTATTGGGCGTAAAGGGCGTGTAGGCGGTCTAGTACGTCAGATGTGAAATACCTGGGCTTAACCTAGGAACTGCATTTGATACGGCTAGTCTAGAGTGTGAGAGGGTGGAGCGGAACGGCGAGTGGAGCAGTGAAATGCGTTGATATTCGTTGGAACACCGGGGGCGAAGGCGGCTCCATGGCTCACTACTGACGCTGAGACGCGAAAGCG	Proteobacteria	Zetaproteobacteria	Mariprofundus	NA	NA	NA	NA	NA	NA
CGTTGTTCGGATTTACTGGGCGTAAAGAGTGCGTAGGCGGTTTAGTAAGTTGGAAGTGAAAGCCCGAGGCTTAACCTCGGAACTGCTTTCAAAACTACTAATCTAGAGTGTAGTAGGGGATGATGGAATTCCTAGTGTAGGGGTGAAATCCTTTGATATTAGGAGGAACACCGGTGGCGAAGGCGGTCATCTGGGCTACAACTGACGCTGATGCACGAAAGCG	Proteobacteria	Alphaproteobacteria	Rickettsia prowazekii str. Rp22	NA	NA	24.4413	3.53272e-11	25.2699	1.63998e-10
CGTTGTTCGGATTTACTGGGCGTAAAGAGTGCGTAGGCGGTTTAGTAAGTTGGTCGTGAAAGCCCGAGGCTTAACCTCGGAACTGCGGCCAAAACTACTAATCTAGAGTGTAGTAGGGGATGATGGAATTTCTAGTGTAGAGGTGAAATTCTTAGATATTAGAAGGAACACCGGTGGCGAAGGCGGTCATCTGGGCTACAACTGACGCTGATGCACGAAAGCG	Proteobacteria	Alphaproteobacteria	Rickettsia prowazekii str. Madrid E	NA	NA	23.3645	1.97341e-09	23.5504	1.13245e-08
TGTTATCCGGAATCACTGGGCGTAAAGCGTCTGTAGGTGGTCAAATAAGTCAACTGTTAAATCTTGAGGCTCAACCTTAAAATCGCAGTCGAAACTATTAGACTAGAGTATAGTAGGGGTAAAGGGAATTTCCAGTGGAGCGGTGAAATGCGTAGAGATTGGAAGGAACATCAGTGGCGAAGGCGGCCACCTGGATTGATACTGACGCTGAGGTGCGAAAGCG	Proteobacteria	Gammaproteobacteria	Moraxellaceae	NA	NA	17.4257	1.14412e-05	23.0399	1.58498e-08
TGTTATCCGGAATCACTGGGCGTAAAGCGTCTGTAGGTGGTCCAATAAGTCAACTGTTAAATCTTGAGGCTCAACTTCAAAATCGCAGTCGAAACTATTAGACTAGAGTATAGTAGGGGTAAAGGGAATTTCCAGTGGAGCGGTGAAATGCGTAGAGATTGGAAGGAACATCAGTGGCGAAGGCGGCCACCTGGATTGATACTGACGCTGAGGTGCGAAAGCG	Proteobacteria	Gammaproteobacteria	Glaciecola amylolytica	NA	NA	NA	NA	NA	NA
TGTTATTTTTCTTTACTGGGCGTAAAGTGTTTGTAGATTGTTAAAACTGTTTAATGAAAAATCCTCAAGCCTAACTTGGGAATATCGTTTTATACGTTTTAACTCCGAGTTAACGAAGGGTTAGTAGAATTTCTAATAGAAGGATGAAATCTTATCAAATTAGAAGGAATACCAGAAGCGAAGGCGACTAACTTGTTTTATAACTGACGTTGAAAAACGAAAGCG	Spirochaetes	Spirochaetia	Borreliaceae	NA	NA	26.4037	3.40907e-11	23.5951	1.65882e-08
CGTAGTTCGGAATTACTGGGCTTAAAGAGCTCGTAGGTGGTTAAAAAAGTTGATGGTGAAATCCCAAGGCTCAACCTTGGAACTGCCATCAAAACTTTTTAGCTAGAGTGTGATAGAGGTAAGTGGAATTTCTAGTGTAGAGGTGAAATTCGTAGATATTAGAAAGAACACCAAATGCGAAGGCAACTTACTGGGTCACTACTGACACTGAGGAGCGAAAGCA	Proteobacteria	Alphaproteobacteria	Candidatus Pelagibacter	NA	NA	9.25744	0.0351849	NA	NA
CGTTAATCGGAATTACTGGGCGTAAAGCGTGCGCAGGCGGTTTTGTAAGACAGTCGTGAAATCCCCGGGCTCAACCTGGGAATGGCGATTGTGACTGCAAGGCTGGAGTGCGGCAGAGGGGGATGGAATTCCGCGTGTAGCAGTGAAATGCGTAGATATGCGGAGGAACACCGATGGCGAAGGCAATCCCCTGGGCCTGCACTGACGCTCATGCACGAAAGCG	Proteobacteria	Betaproteobacteria	Comamonadaceae	NA	NA	NA	NA	NA	NA
CGTTATCCGGCATAACTGGGCGTAAAGGGTCCGTAGACTGTAAAATAAGTTATTAGTTTTAAATCTAAAAGCCTAACTTTTAGTCAGCTTGTAATACTGTTTTACTTGAGTTTTATACAGAAGAATAGAATTTTATATGAAAGGGTGAAATCTCAAGATATATAAAGGAATATCAGTGGCGAAAGCGGTTCTTTAGTAAAAACTGACGTTGAGGGACGAAAGTG	Tenericutes	Mollicutes	Mycoplasmataceae	NA	NA	20.892	7.2515e-06	21.5915	6.21661e-07
CGTTATCCGGCATGACTGGGCGTAAAGAGTCCGTAGACTGTAAAGTAAGTTTTTTGTTAAATCTTAAAACCTAATTTTAAAACAAGCAATTAATACTGCTTTACTTTGAGTTTAATACAGAAAAGTGGAATTTTATACGACAGGGGTGAAATCTGCAGATATATAAAGGAACATCAATAGCGAAGGCAACTTTTTAGTATAAACTGACGTTGAGGGACGAAAGTG	Tenericutes	Mollicutes	Mycoplasmataceae	NA	NA	-22.1253	9.98825e-08	-26.2268	3.94453e-10
CGTTATTCGGATTCACTGGGCGTAAAGGGTGCGCAGGCGGTTGTGTGTGTCAGGTGTGAAATCTCGGGGCTTAACCCCGAAACTGCGCCTGAAACTACACGACTAGAGCATTGGAGAGGGTAGCGGAATTCATGGTGTAGCAGTGAAATGCGTAGATATCATGAGGAACACCAGAGGCGAAGGCGGCTACCTGGACAATTGCTGACGCTCAGGCACGAAAGCG	Verrucomicrobia	Opitutae	Opitutaceae	NA	NA	21.6353	1.98241e-07	22.203	1.70199e-07
CGTTGTTCGGAATTACTGGGCGTAAAGCGTACGTAGGCGGATTAATAAGTAAGAGGTGAAATCCCAGGGCTCAACCCTGGAACTGCCTTTTAAACTGTTAGTCTTGAGATCGAGAGAGGTGAGTGGAATTCCAAGTGTAGAGGTGAAATTCGTAGATATTTGGAGGAACACCAGTGGCGAAGGCGGCTCACTGGCTCGATACTGACGCTGAGGTACGAAAGTG	Proteobacteria	Alphaproteobacteria	Yoonia vestfoldensis	NA	NA	22.1942	9.98825e-08	21.6533	3.56792e-07
CGTAGTTCGGAATTACTGGGCTTAAAGAGTTCGTAGGTGGTTAAAATAGTTGATGGTGAAATCCCAAGGCTCAACCTTGGAACTGCCATCAAAACTTTTTAGCTAGAGTATGATAGAGGAAAGTGGAATTTCTAGTGTAGAGGTGAAATTCGTAGATATTAGAAAGAACATCAAAAGCGAAGGCAACTTTCTGGATCATTACTGACACTGAGGAACGAAAGCA	Proteobacteria	Alphaproteobacteria	Candidatus Pelagibacter	23.2502	3.49774e-09	NA	NA	-24.4398	1.02245e-09
CGTTAATCGGAATTACTGGGCGTAAAGCGCGCGTAGGTGGCTTATTAAGTCAGATGTGAAAGCCCTGGGCTTAACCTAGGAATTGCATTTGAAACTGGTTCGCTAGAGTATGGTAGAGGGAAGTGGAATTCCACATGTAGCGGTGAAATGCGTAGAGATGTGGAGGAACACCAGTGGCGAAGGCGACTTCCTGGACCAATACTGACACTGAGGTGCGAAAGCG	Proteobacteria	Gammaproteobacteria	Beggiatoa leptomitoformis	8.05379	0.047007	NA	NA	-7.75699	0.0667137
CGTTAATCGGAATTACTGGGCGTAAAGCGCGCGTAGGTGGTTTGATAAGCTAGCTGTGAAAGCCCTGGGCTCAACCTAGGAACTGCAGTTAGAACTGTCTGACTAGAGTACAGTAGAGGGTGGCGGAATTTCCTGTGTAGCGGTGAAATGCGTAGATATAGGAAGGAACATCAGTGGCGAAGGCGGCCACCTGGACTGATACTGACACTGAGGTGCGAAAGCG	Proteobacteria	Gammaproteobacteria	Azotobacter chroococcum NCIMB 8003	NA	NA	NA	NA	7.75821	0.0754876
CGTTATCCGGCATGACTGGGCGTAAAGAGTCCGTAGACTGTAAAGTAAGTTTTTTGTTAAATTTTAAAACTTAATTTTAAATTAATCAATTAATACTGCTTTACTTAGAGTTTAATACAGAAAAGCAGAATTTTATACGAAAGGGTGAAATCTGTAGATATATAAAGGAATATCGGTAGCGAAGGCGGCTTTTTGGTATAAACTGACGTTGAGGGACGAAAGTG	Proteobacteria	Gammaproteobacteria	Glaciecola amylolytica	-22.4108	3.26743e-08	NA	NA	25.4316	1.02245e-09
TGTTATTCGAAATAATTGGGCGTAAAGGGTACGTAGGCGTTTTATTAAGTTTTTTGTTAAAGCCCTTGGCTTAACTAAGGTATAACGATCAATACTAATAAAATAGAATAGGATATAAGATAATGGAATTTCTAATGTAGGAGTAAGTACCGCAGATATTAGAAGGAACATCGGTGGCGAAGGCGATTATCTAGATCTTTATTGACGCTGAGGTACGAAGGCG	Proteobacteria	Alphaproteobacteria	Neorickettsia	22.9433	9.02806e-13	NA	NA	-24.447	1.79096e-13
CGTTAATCGGAATTACTGGGCGTAAAGCGTCTGTAGGTGGTTTAATAAGTCAACTGTTAAATCTTGAAGCTCAACTTCAAAATCGCAGTCGAAACTATTAGACTAGAGTATAGTAGGGGTAAAGGGAATTTCCAGTGGAGCGGTGAAATGCGTAGAGATTGGAAAGAACACCGATGGCGAAGGCACTTTACTGGGCTATTACTAACACTGAGAGACGAAAGCT	Proteobacteria	Gammaproteobacteria	Francisellaceae	8.48235	0.0898122	NA	NA	NA	NA
